# Supplementary material for: Pd nanoparticles supported on low-defect graphene sheets: for use as high-performance electrocatalysts for formic acid and methanol oxidation
Source: Royal Society of Chemistry journal article supplement (doi:10.1039/c2jm33727d), 2012-01-01
Supplement: c2jm33727d.pdf [file c2jm33727d.pdf]

Supporting Information for:

**Pd nanoparticles supported on low-defect graphene sheets:  
for use as high-performance electrocatalysts for formic acid  
and methanol oxidation**

Huajie Huang and Xin Wang\*

Key Laboratory of Soft Chemistry and Functional Materials, (Nanjing University of  
Science and Technology), Ministry of Education, Nanjing, 210094, China.

E-mail: wxin@public1.ptt.js.cn

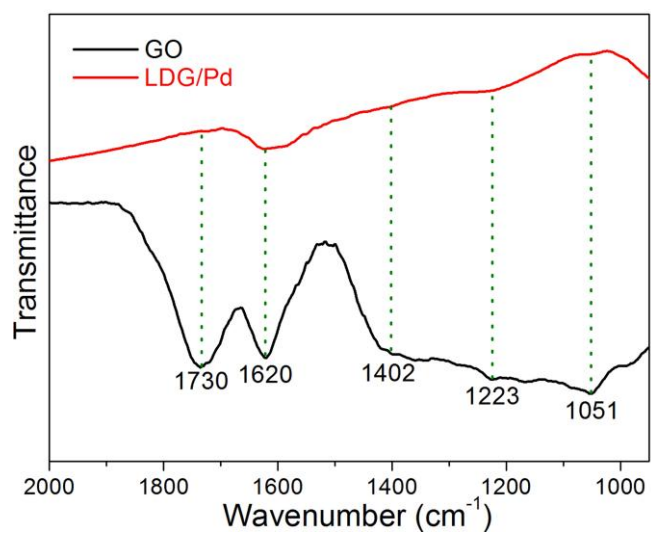

**Fig. S1** FT-IR spectra of GO and LDG/Pd.

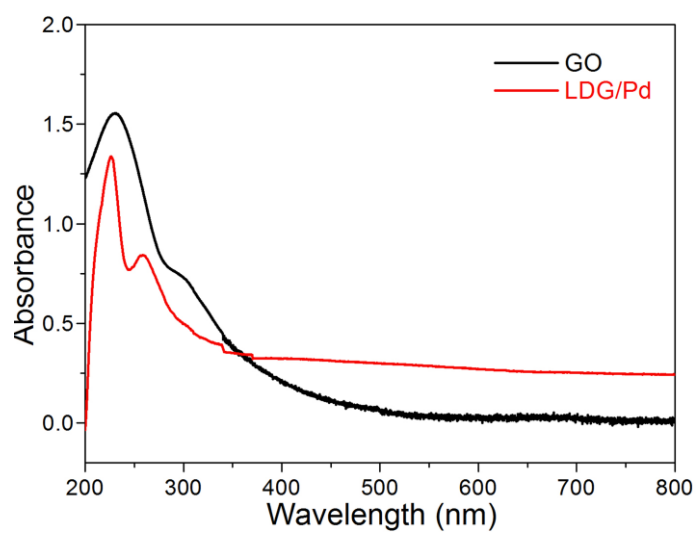

**Fig. S2** UV-vis absorption spectra of GO and LDG/Pd.
